# Supplementary material for: Genome at Juncture of Early Human Migration: A Systematic Analysis of Two Whole Genomes and Thirteen Exomes from Kuwaiti Population Subgroup of Inferred Saudi Arabian Tribe Ancestry
Source: PLOS journal article supplement (doi:10.1371/journal.pone.0099069), 2014-06-04
Supplement: S6 (10.1371/journal.pone.0099069.s006) [file journal.pone.0099069.s006]

| Class <sup>\$</sup>  | UE dataset |       |       |       | UW dataset |       |       |       |
|----------------------|------------|-------|-------|-------|------------|-------|-------|-------|
|                      | SNP        |       | Indel |       | SNP        |       | Indel |       |
|                      | Known      | Novel | Known | Novel | Known      | Novel | Known | Novel |
| Coding               | 38         | 7     | 0     | 4     | 0          | 0     | 0     | 0     |
| Coding, Splicing     | 0          | 0     | 0     | 0     | 0          | 0     | 0     | 0     |
| Downstream           | 0          | 0     | 0     | 0     | 5          | 0     | 0     | 28    |
| Downstream, Upstream | 0          | 0     | 0     | 0     | 0          | 0     | 0     | 0     |
| Intergenic           | 1          | 0     | 0     | 0     | 531        | 188   | 0     | 2107  |
| Intronic             | 0          | 0     | 0     | 4     | 262        | 72    | 0     | 1272  |
| NCExonic             | 11         | 3     | 0     | 14    | 1          | 0     | 0     | 1     |
| NCSplicing           | 0          | 0     | 0     | 0     | 0          | 0     | 0     | 0     |
| Splicing             | 0          | 0     | 0     | 0     | 0          | 0     | 0     | 0     |
| 3' UTR               | 27         | 13    | 0     | 266   | 0          | 0     | 0     | 2     |
| 3' UTR, 5' UTR       | 0          | 0     | 0     | 0     | 0          | 0     | 0     | 0     |
| 5' UTR               | 8          | 1     | 0     | 18    | 0          | 0     | 0     | 1     |
| Upstream             | 0          | 0     | 0     | 0     | 5          | 1     | 0     | 17    |

<sup>\$</sup>, Legends to the class types

- Coding** - Variant is in the coding exonic region of a protein coding transcript.
- Splicing** - Variant affects a nucleotide that is in a splicing region of a coding transcript.
- Downstream** - Variant is within 1000 bp of the transcript stop site on the 3' side.
- Upstream** - Variant is within 1000 bp of the transcript start site on the 5' side.
- Intergenic** - Variant does not interact with any gene transcripts.
- Intronic** - Variant lies within an intron.
- NCSplicing** - Variant affects a nucleotide that is in a splicing region of a non-coding transcript.
- NCExonic** - Variant is in an exon for a non-coding transcript.
- UTR5** - Variant is in an exon of a coding transcript but is on the 5' side of the start codon.
- UTR3** - Variant is in an exon of a coding transcript but is on the 3' side of the stop codon.
